# Supplementary material for: Sol–gel synthesis of alumina gel@zeolite X nanocomposites for high performance water defluoridation: batch and column adsorption study
Source: Royal Society of Chemistry journal article supplement (doi:10.1039/d2ma00392a), 2022-01-01
Supplement: d2ma00392a1.pdf [file d2ma00392a1.pdf]

## Electronic Supporting Information

### **Sol-gel synthesis of alumina gel@zeolite X nanocomposite for high performance water defluoridation: Batch and column adsorption study**

Adwitiya Chakraborty and Milan KantiNaskar\*

Central Glass and Ceramic Research Institute (CSIR)

Kolkata 700 032

(a)

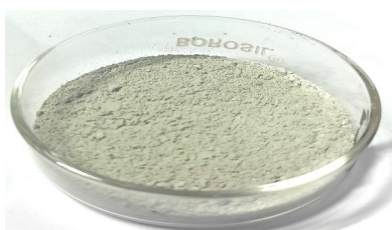

(b)

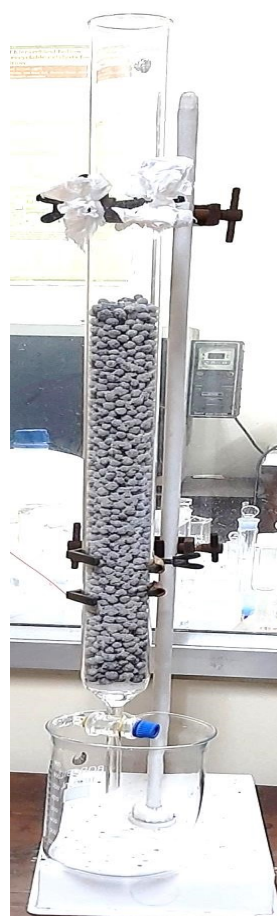

**Fig. S1: (a) Synthesized alumina gel@zeolite X nanocomposite and (b) fixed bed column.**

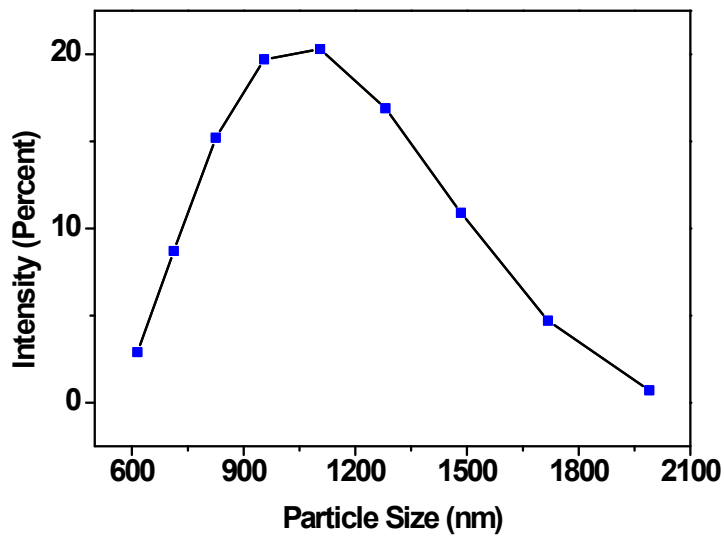

Fig. S2 : Particle size distribution of alumina gel@zeolite X nanocomposite

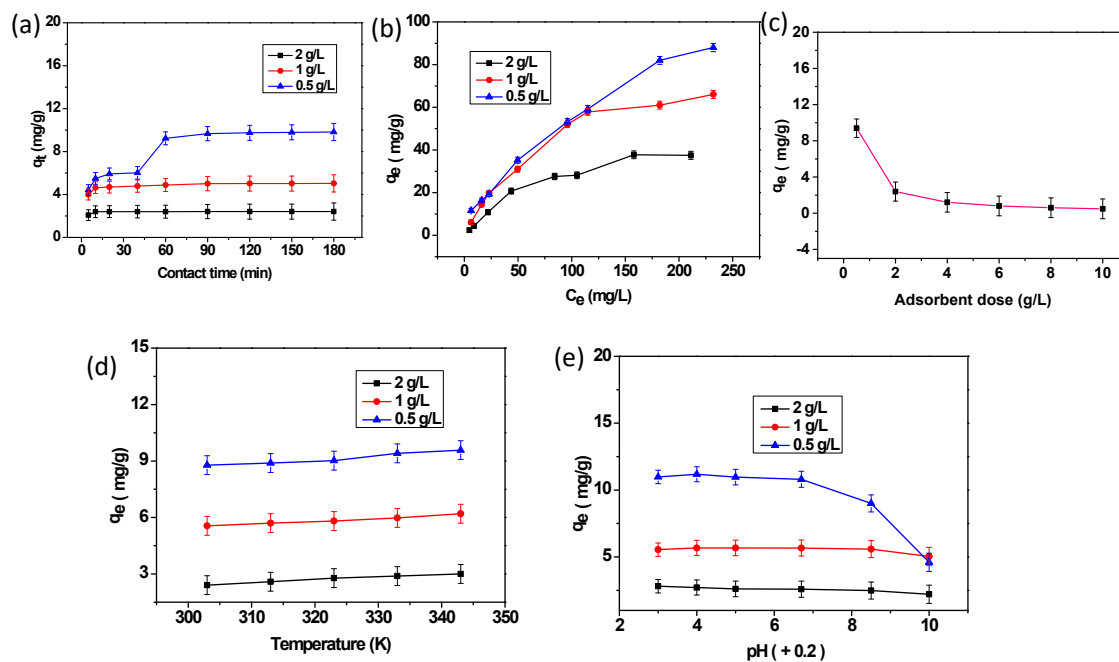

Fig. S3: Adsorption capacity with (a) contact time, (b) initial fluoride ion concentration, (c) adsorbent dose, (d) temperature and (e) pH on the adsorption of  $F^-$  ions by alumina gel@zeolite X nanocomposite

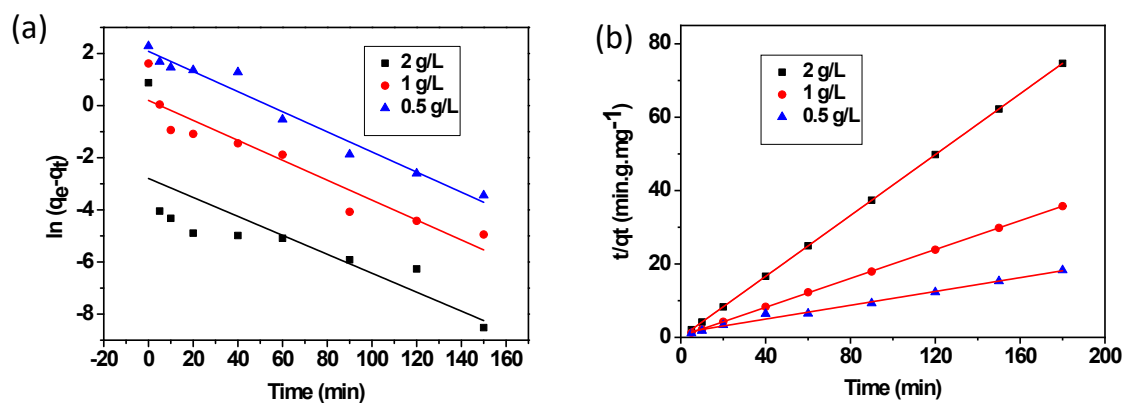

**Fig. S4:** Kinetics data with linear fitting of (a) pseudo-first-order and (b) pseudo-second-order

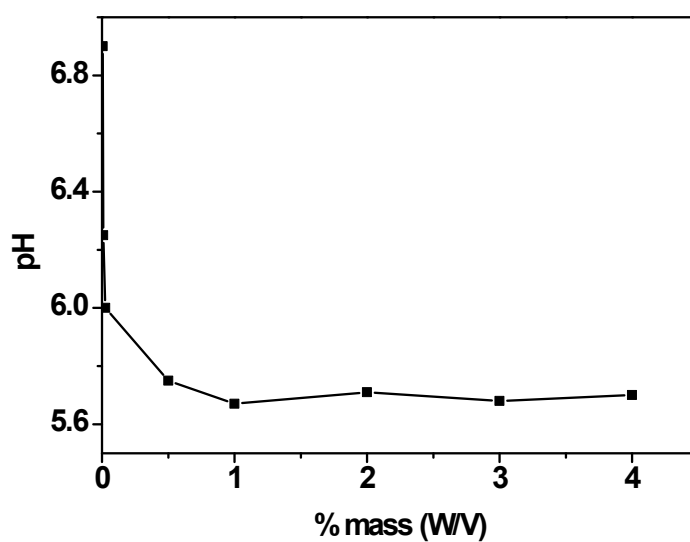

**Fig. S5:** pH vs percentage mass of the adsorbent

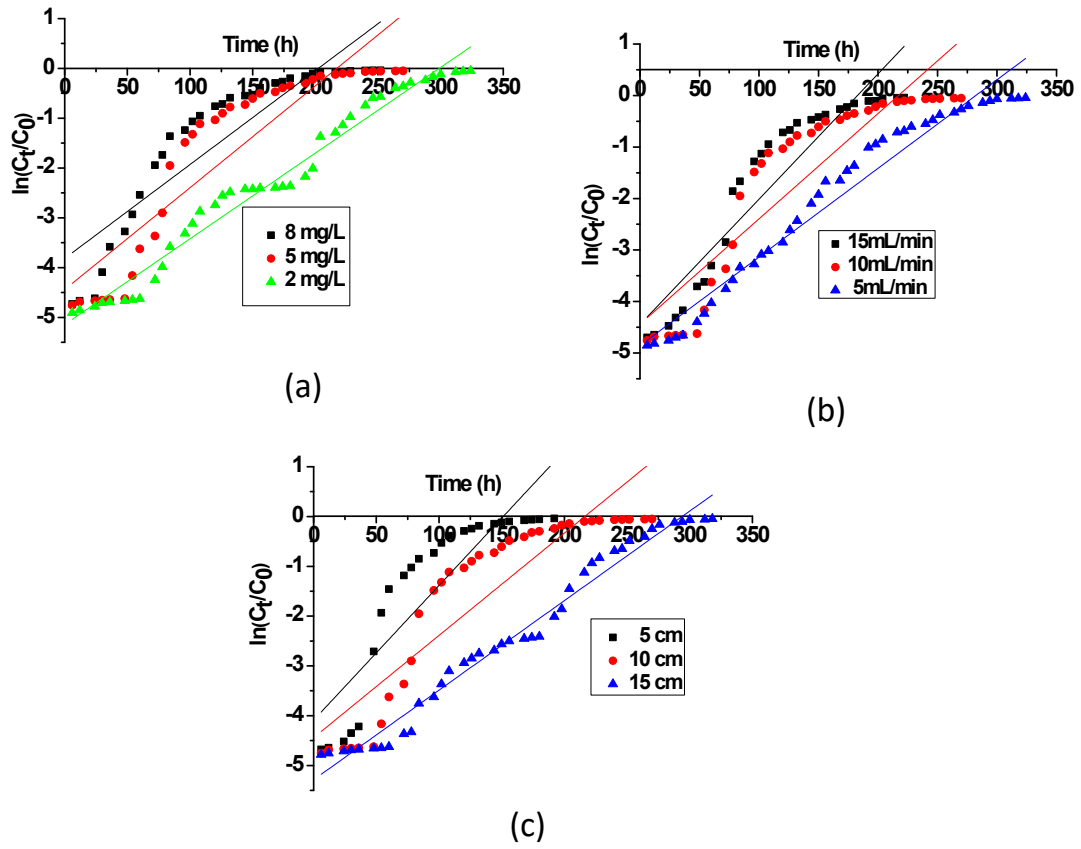

**Fig. S6:** Linear regression analysis of breakthrough curves using Adams-Bohart model at different (a) concentrations, (b) flow rates and (c) bed heights

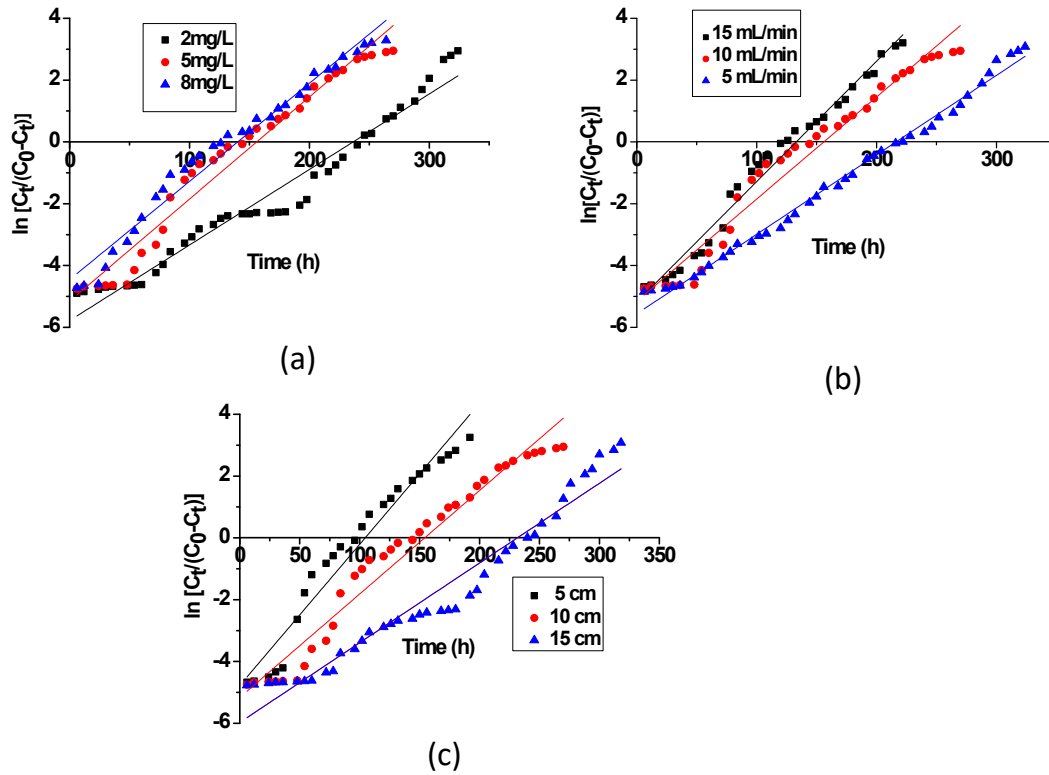

**Fig. S7:** Linear regression analysis of breakthrough curves using Yoon-Nelson model at different (a) concentrations, (b) flow rates and (c) bed heights.

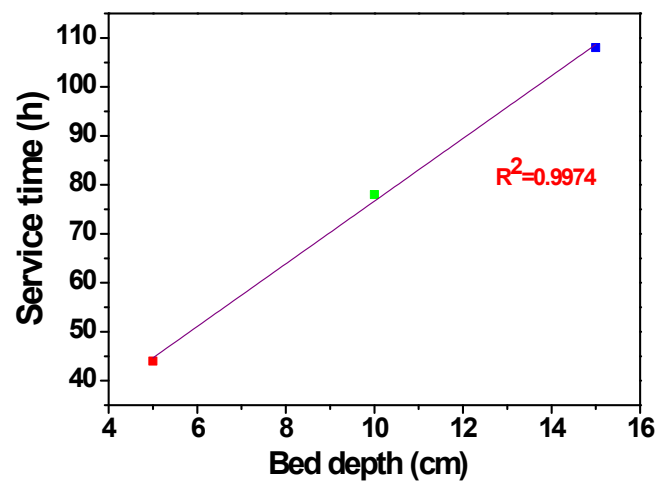

**Fig. S8:** Linear Plot of BDST for fluoride adsorption

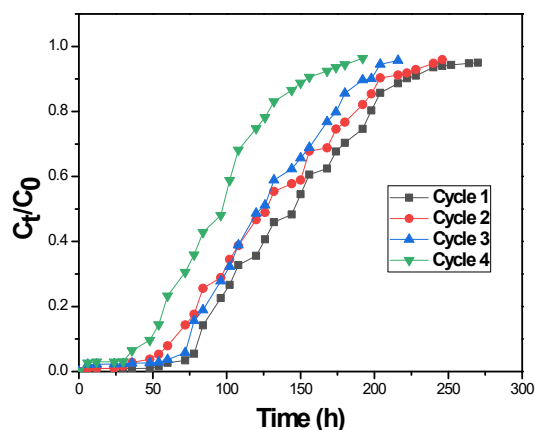

**Fig. S9:** Desorption-regeneration cycle for fluoride removal

**Table S1:** Adsorption capacity (mg/g) of zeolite X and alumina gel@zeolite X nanocomposites

| Time (min) | Initial adsorbate conc. (ppm) | Adsorbent dose(gm/L) | Adsorption capacity (mg/g) of zeolite X | Adsorption capacity (mg/g) of alumina gel@zeolite X |
|------------|-------------------------------|----------------------|-----------------------------------------|-----------------------------------------------------|
| 120        | 5                             | 0.50                 | 2.6                                     | 9.75                                                |
|            |                               | 1.00                 | 0.70                                    | 5.02                                                |
|            |                               | 2.00                 | 0.55                                    | 2.40                                                |

**Table S2:** Kinetic parameters for the adsorption of fluoride ions

| Model                       | Mathematical expression             |                             | Adsorbent dose (g/L) |         |         |
|-----------------------------|-------------------------------------|-----------------------------|----------------------|---------|---------|
|                             |                                     |                             | 0.5                  | 1.0     | 2.0     |
| Pseudo-first order kinetics | $\ln(q_e - q_t) = -k_1 t + \ln q_e$ | $k_1$ ( $\text{min}^{-1}$ ) | 0.03861              | 0.03824 | 0.03636 |
|                             |                                     | $q_e$ (mg/g)                | 8.026                | 1.2200  | 0.06110 |
|                             |                                     | $R^2$                       | 0.9657               | 0.8823  | 0.5616  |
|                             |                                     | S.E (Intercept)             | 0.346                | 0.375   | 0.729   |
|                             |                                     | S.E(Slope)                  | 0.003                | 0.004   | 0.008   |

|                              |                                 |                  |        |        |        |
|------------------------------|---------------------------------|------------------|--------|--------|--------|
| Pseudo-second order kinetics | $t/q_t = 1/k_2q_e^2 + (1/q_e)t$ | $k_2$ (g/mg·min) | 0.0729 | 0.1239 | 4.52   |
|                              |                                 | $q_e$ (mg/g)     | 10.62  | 5.07   | 2.411  |
|                              |                                 | R <sup>2</sup>   | 0.9999 | 0.9999 | 0.9999 |
|                              |                                 | S.E (Intercept)  | 0.198  | 0.056  | 0.011  |
|                              |                                 | S.E(Slope)       | 0.002  | 0.0005 | 0.0001 |

Note:  $q_e$  and  $q_t$  (mg/ g) are the amounts of fluoride adsorbed at equilibrium and time  $t$  (min), and  $k_1$  ( $\text{min}^{-1}$ ) and  $k_2$  ( $\text{g}\cdot\text{mg}^{-1}\cdot\text{min}^{-1}$ ) are the first and second-order rate constants, respectively, SE = Standard Error.

Table S3: The parameters obtained from Langmuir and Freundlich models

| Adsorbent dose (g/L) |                                        | 0.5             | 1.0    | 2.0    |         |
|----------------------|----------------------------------------|-----------------|--------|--------|---------|
| Langmuir isotherm    | $C_e/q_e = C_e/q_m + 1/K_L \cdot q_m$  | $K_L$ (L/mg)    | 0.0217 | 0.0972 | 0.26431 |
|                      |                                        | $q_m$ (mg/g)    | 103.62 | 68.119 | 37.608  |
|                      |                                        | R <sup>2</sup>  | 0.8973 | 0.9877 | 0.9822  |
|                      |                                        | S.E (Intercept) | 0.113  | 0.0476 | 0.080   |
|                      |                                        | S.E (Slope)     | 0.001  | 0.0006 | 0.001   |
| Freundlich isotherm  | $\log q_e = \log K_F + 1/n_F \log C_e$ | $K_L$ (L/mg)    | 10.452 | 11.668 | 10.739  |
|                      |                                        | $q_m$ (mg/g)    | 2.653  | 2.764  | 3.495   |
|                      |                                        | R <sup>2</sup>  | 0.8781 | 0.9826 | 0.9245  |
|                      |                                        | S.E (Intercept) | 0.197  | 0.061  | 0.106   |
|                      |                                        | S.E(Slope)      | 0.052  | 0.018  | 0.030   |

Note:  $q_e$  is the amounts of fluoride adsorbed at equilibrium and  $q_m$  is  $q_e$  for a complete monolayer, i.e., maximum adsorption capacity (mg/g),  $K_L$  is adsorption equilibrium constant (L/mg);  $K_F$  and  $n_F$  are empirical constants, indicating the adsorption capacity and adsorption intensity, respectively, SE = Standard Error.

**Table S4: A comparative data on maximum adsorption capacity, kinetics and rate constant for fluoride ion adsorption by alumina gel@zeolite X nanocomposite and reported adsorbents**

| <b>Adsorbents</b>                                    | <b>Maximum adsorption capacity (mg/g) at 25 °C</b> | <b>Kinetics</b>            | <b>Value of rate constant <i>k</i></b> | <b>Ref</b>          |
|------------------------------------------------------|----------------------------------------------------|----------------------------|----------------------------------------|---------------------|
| <b>Bentonite/chitosan beads</b>                      | <b>1.164</b>                                       | <b>Pseudo second order</b> | <b>149.67 (g/mg.min)</b>               | <b>1</b>            |
| <b>Crystalline gamma alumina</b>                     | <b>32</b>                                          | <b>Pseudo second order</b> | <b>0.02678 (g/mg.min)</b>              | <b>2</b>            |
| <b>PVA-alginate/CTAB</b>                             | <b>12.93</b>                                       | <b>Pseudo second order</b> | <b>1.149 (g/mg.min)</b>                | <b>3</b>            |
| <b>Perchloric acid cross-linked calcium alginate</b> | <b>44</b>                                          | <b>Pseudo second order</b> | <b>0.026 (g/mg.min)</b>                | <b>4</b>            |
| <b>Aluminium impregnated chitosan</b>                | <b>1.73</b>                                        | <b>First order</b>         | <b>0.101 min<sup>-1</sup></b>          | <b>5</b>            |
| <b>Aluminium coated modified zeolite</b>             | <b>11.52</b>                                       | <b>Pseudo second order</b> | <b>0.6804 (g/mg.min)</b>               | <b>6</b>            |
| <b>Alumina gel@zeolite X</b>                         | <b>103.62</b>                                      | <b>Pseudo second order</b> | <b>0.0729 (g/mg.min)</b>               | <b>Present work</b> |



**Table S5**

(a) Adams-Bohart Model Parameters

| $C_0$ (mg/L) | Q(ml/min) | Z(cm) | $K_{AB} \times 10^{-3}$<br>(L/mg h) | $N_0$ (mg/L) | $R^2$  |
|--------------|-----------|-------|-------------------------------------|--------------|--------|
| 2            | 10        | 10    | 8.60                                | 5072.13      | 0.9729 |
| 5            | 10        | 10    | 4.09                                | 9214.74      | 0.8258 |
| 8            | 10        | 10    | 2.35                                | 13782.75     | 0.8120 |
| 5            | 5         | 10    | 3.18                                | 6481.32      | 0.9584 |
| 5            | 10        | 10    | 3.78                                | 9970.38      | 0.8258 |
| 5            | 15        | 10    | 4.50                                | 12564.18     | 0.8727 |
| 5            | 10        | 5     | 5.00                                | 13886        | 0.7802 |
| 5            | 10        | 10    | 3.80                                | 9917.06      | 0.8250 |
| 5            | 10        | 15    | 3.29                                | 8983.81      | 0.9776 |

(b) Thomas Model Parameters

| $C_0$ (mg/L) | Q(ml/min) | Z(cm) | $K_{Th} \times 10^{-3}$<br>(L/mg h) | $q_0$ (mg/g) | $R^2$   |
|--------------|-----------|-------|-------------------------------------|--------------|---------|
| 2            | 10        | 10    | 12.22                               | 4.729        | 0.9621  |
| 5            | 10        | 10    | 6.602                               | 7.799        | 0.9638  |
| 8            | 10        | 10    | 3.96                                | 11.232       | 0.9728  |
| 5            | 5         | 10    | 4.73                                | 5.86         | 0.9918  |
| 5            | 10        | 10    | 6.11                                | 8.425        | 0.9638  |
| 5            | 15        | 10    | 7.21                                | 10.77        | 0.9827  |
| 5            | 10        | 5     | 8.45                                | 11.302       | 0.9516  |
| 5            | 10        | 10    | 6.20                                | 8.326        | 0.9631  |
| 5            | 10        | 15    | 4.77                                | 8.335        | 0.95233 |

(c) Yoon-Nelson Model Parameters

| <b>C<sub>0</sub> (mg/L)</b> | <b>Q(ml/min)</b> | <b>Z(cm)</b> | <b>K<sub>YN</sub>×10<sup>-3</sup> (hr<sup>-1</sup>)</b> | <b>τ(hr)</b> | <b>R<sup>2</sup></b> |
|-----------------------------|------------------|--------------|---------------------------------------------------------|--------------|----------------------|
| 2                           | 10               | 10           | 24.43                                                   | 236.54       | 0.9622               |
| 5                           | 10               | 10           | 33.01                                                   | 156          | 0.9638               |
| 8                           | 10               | 10           | 31.77                                                   | 140          | 0.9732               |
| 5                           | 5                | 10           | 25.71                                                   | 216.24       | 0.9961               |
| 5                           | 10               | 10           | 33.01                                                   | 155.99       | 0.9638               |
| 5                           | 15               | 10           | 38.95                                                   | 132.95       | 0.9827               |
| 5                           | 10               | 5            | 45.66                                                   | 104          | 0.9513               |
| 5                           | 10               | 10           | 33.48                                                   | 154.21       | 0.9631               |
| 5                           | 10               | 15           | 25.79                                                   | 231.51       | 0.9523               |

(d) BDST Model Parameters

| <b>C<sub>0</sub> (mg/L)</b> | <b>Q(ml/min)</b> | <b>Z(cm)</b> | <b>N<sub>0</sub>(mg/L)</b> | <b>K<sub>a</sub> (L/mg hr)</b> | <b>R<sup>2</sup></b> |
|-----------------------------|------------------|--------------|----------------------------|--------------------------------|----------------------|
| 5                           | 10               | 5            | 2933.55                    | 0.0430                         | 0.9974               |
| 5                           | 10               | 10           |                            |                                |                      |
| 5                           | 10               | 15           |                            |                                |                      |

## References

- 1 Y. Zhang, D. Wang, B. Liu, X. Gao, W. Xu, P. Liang, and Y. Xu, *Am. J. Anal. Chem.*, 2013, 4, 48-53.
- 2 P. Chinnakoti, A.L.A Chunduri, R.K. Vankayala, S. Patnaik, and V. Kamisetti, *Appl. Water Sci.*, 2017, 7, 2413-2423.
- 3 P. Kathane and A. Tiwari *Adv. Phys. Lett.*, 2016, 3, 2349-1108.
- 4 V. Yarramuthi, J. M. Jagadeeson, K. D. Rachapudi and R. K. Challagundla , *Indian J. Adv. Chem. Sci.*, 2018; 6(2), 88-95.
- 5 S. K. Swain, R. K. Dey, M. Islam, R. K. Patel, U. Jha, T. Patnaik, and C. Airoidi, *Sep. Sci. Technol.*, 2009, 44, 2096–2116.
- 6 Y.D. Wirtu, F. Melak, M. Yitbarek and H. Astatkie, *Groundwater Sustain. Dev.*, 2021, 12, 100525.
